# Supplementary material for: Expression Profiling of Human Immune Cell Subsets Identifies miRNA-mRNA Regulatory Relationships Correlated with Cell Type Specific Expression
Source: PLoS One. 2012 Jan 20;7(1):e29979. doi: 10.1371/journal.pone.0029979 (PMC3262799; doi:10.1371/journal.pone.0029979)
Supplement: Table S7 — List of target genes that are regulated by multiple miRNAs. (XLS) [file pone.0029979.s012.xls]

## Sheet: table_S7
Index	Gene	miRNA	miRNA cell-type specificity	Chromosome	Seed Site Position	Strand (0 = Forward, 1 = Reverse)
1	ABL2	mir-143	Neutrophils	CHR1	177343320	1
		mir-17	Monocytes,Eosinophils,Neutrophils	CHR1	177335849	1
		mir-223	Monocytes,Eosinophils,Neutrophils	CHR1	177342532	1
		mir-25	Eosinophils,Neutrophils	CHR1	177335107	1
		mir-27	Monocytes,Eosinophils,Neutrophils	CHR1	177335222	1
2	EIF4A2	mir-145	Neutrophils	CHR3	187988858	0
		mir-17	Monocytes,Eosinophils,Neutrophils	CHR3	187985867	0
		mir-25	Eosinophils,Neutrophils	CHR3	187987326	0
		mir-27	Monocytes,Eosinophils,Neutrophils	CHR3	187985645	0
3	EPC1	mir-143	Neutrophils	CHR10	32602044	1
		mir-145	Neutrophils	CHR10	32597120	1
		mir-27	Monocytes,Eosinophils,Neutrophils	CHR10	32596854	1
		mir-425	Monocytes,Eosinophils,Neutrophils	CHR10	32597631	1
4	INO80D	mir-143	Neutrophils	CHR2	206571674	1
		mir-145	Neutrophils	CHR2	206568437	1
		mir-17	Monocytes,Eosinophils,Neutrophils	CHR2	206569705	1
		mir-27	Monocytes,Eosinophils,Neutrophils	CHR2	206566699	1
5	ATXN7L1	mir-143	Neutrophils	CHR7	105186980	1
		mir-17	Monocytes,Eosinophils,Neutrophils	CHR7	105032565	1
		mir-223	Monocytes,Eosinophils,Neutrophils	CHR7	105033586	1
6	NUCKS1	mir-145	Neutrophils	CHR1	203951648	1
		mir-17	Monocytes,Eosinophils,Neutrophils	CHR1	203949404	1
		mir-223	Monocytes,Eosinophils,Neutrophils	CHR1	203953091	1
7	AMMECR1	mir-143	Neutrophils	CHRX	109326183	1
		mir-191	Monocytes,Eosinophils,Neutrophils	CHRX	109328292	1
		mir-425	Monocytes,Eosinophils,Neutrophils	CHRX	109575035	1
8	CBFB	mir-143	Neutrophils	CHR16	65692352	0
		mir-145	Neutrophils	CHR16	65691174	0
		mir-223	Monocytes,Eosinophils,Neutrophils	CHR16	65691625	0
9	PDS5A	mir-143	Neutrophils	CHR4	39501019	1
		mir-17	Monocytes,Eosinophils,Neutrophils	CHR4	39500888	1
		mir-25	Eosinophils,Neutrophils	CHR4	39502768	1
10	KLF12	mir-17	Monocytes,Eosinophils,Neutrophils	CHR13	73606051	1
		mir-25	Eosinophils,Neutrophils	CHR13	73163061	1
		mir-27	Monocytes,Eosinophils,Neutrophils	CHR13	73158327	1
11	CBX5	mir-143	Neutrophils	CHR12	52914891	1
		mir-223	Monocytes,Eosinophils,Neutrophils	CHR12	52911099	1
		mir-27	Monocytes,Eosinophils,Neutrophils	CHR12	52921611	1
12	MIER3	mir-17	Monocytes,Eosinophils,Neutrophils	CHR5	56252590	1
		mir-25	Eosinophils,Neutrophils	CHR5	56251739	1
		mir-27	Monocytes,Eosinophils,Neutrophils	CHR5	56252061	1
13	METT11D1	mir-143	Neutrophils	CHR14	20531019	0
		mir-191	Monocytes,Eosinophils,Neutrophils	CHR14	20527976	0
		mir-223	Monocytes,Eosinophils,Neutrophils	CHR14	20533103	0
14	SYNCRIP	mir-145	Neutrophils	CHR6	86379188	1
		mir-223	Monocytes,Eosinophils,Neutrophils	CHR6	86377878	1
		mir-425	Monocytes,Eosinophils,Neutrophils	CHR6	86377106	1
15	FRYL	mir-25	Eosinophils,Neutrophils	CHR4	48195874	1
		mir-27	Monocytes,Eosinophils,Neutrophils	CHR4	48194778	1
		mir-652	Monocytes,Eosinophils,Neutrophils	CHR4	48476941	1
16	SLC25A36	mir-145	Neutrophils	CHR3	142179708	0
		mir-17	Monocytes,Eosinophils,Neutrophils	CHR3	142179401	0
		mir-25	Eosinophils,Neutrophils	CHR3	142179362	0
17	ATRX	mir-145	Neutrophils	CHRX	76647978	1
		mir-425	Monocytes,Eosinophils,Neutrophils	CHRX	76650154	1
18	TMEM64	mir-17	Monocytes,Eosinophils,Neutrophils	CHR8	91706836	1
		mir-223	Monocytes,Eosinophils,Neutrophils	CHR8	91706966	1
19	MACF1	mir-145	Neutrophils	CHR1	39341408	0
		mir-25	Eosinophils,Neutrophils	CHR1	39724640	0
20	SFRS18	mir-27	Monocytes,Eosinophils,Neutrophils	CHR6	99953564	1
		mir-652	Monocytes,Eosinophils,Neutrophils	CHR6	99979909	1
21	UCKL1	mir-17	Monocytes,Eosinophils,Neutrophils	CHR20	62059003	1
		mir-25	Eosinophils,Neutrophils	CHR20	62061455	1
22	SETD2	mir-17	Monocytes,Eosinophils,Neutrophils	CHR3	47097570	1
		mir-27	Monocytes,Eosinophils,Neutrophils	CHR3	47097466	1
23	RBMX	mir-25	Eosinophils,Neutrophils	CHRX	135784606	1
		mir-27	Monocytes,Eosinophils,Neutrophils	CHRX	135783089	1
24	DDX5	mir-17	Monocytes,Eosinophils,Neutrophils	CHR17	59926299	1
		mir-27	Monocytes,Eosinophils,Neutrophils	CHR17	59927694	1
25	DDX26B	mir-17	Monocytes,Eosinophils,Neutrophils	CHRX	134531918	0
		mir-25	Eosinophils,Neutrophils	CHRX	134543705	0
26	PAPD5	mir-223	Monocytes,Eosinophils,Neutrophils	CHR16	48820898	0
		mir-425	Monocytes,Eosinophils,Neutrophils	CHR16	48822687	0
27	TET3	mir-150	B cells,T cells,NK cells	CHR2	74184804	0
		mir-29	B cells,T cells	CHR2	74182865	0
28	HECTD1	mir-143	Neutrophils	CHR14	30639436	1
		mir-145	Neutrophils	CHR14	30639645	1
29	LRBA	mir-143	Neutrophils	CHR4	151405815	1
		mir-27	Monocytes,Eosinophils,Neutrophils	CHR4	151405321	1
30	BMPR2	mir-17	Monocytes,Eosinophils,Neutrophils	CHR2	203133121	0
		mir-25	Eosinophils,Neutrophils	CHR2	203133423	0
31	ANKIB1	mir-17	Monocytes,Eosinophils,Neutrophils	CHR7	91868530	0
		mir-25	Eosinophils,Neutrophils	CHR7	91867149	0
32	FUBP3	mir-191	Monocytes,Eosinophils,Neutrophils	CHR9	132503353	0
		mir-223	Monocytes,Eosinophils,Neutrophils	CHR9	132503498	0
33	FOXP1	mir-191	Monocytes,Eosinophils,Neutrophils	CHR3	71090264	1
		mir-652	Monocytes,Eosinophils,Neutrophils	CHR3	71103919	1
34	RABGAP1L	mir-25	Eosinophils,Neutrophils	CHR1	173230843	0
		mir-425	Monocytes,Eosinophils,Neutrophils	CHR1	173230411	0
35	TTC14	mir-145	Neutrophils	CHR3	181808693	0
		mir-25	Eosinophils,Neutrophils	CHR3	181808960	0
36	PHF6	mir-143	Neutrophils	CHRX	133390023	0
		mir-17	Monocytes,Eosinophils,Neutrophils	CHRX	133389648	0
37	TNRC6A	mir-143	Neutrophils	CHR16	24744553	0
		mir-17	Monocytes,Eosinophils,Neutrophils	CHR16	24743322	0
38	RSRC2	mir-143	Neutrophils	CHR12	121555674	1
		mir-17	Monocytes,Eosinophils,Neutrophils	CHR12	121571047	1
39	ITPR1	mir-143	Neutrophils	CHR3	4863731	0
		mir-25	Eosinophils,Neutrophils	CHR3	4863267	0
40	GNAS	mir-145	Neutrophils	CHR20	56905899	0
		mir-652	Monocytes,Eosinophils,Neutrophils	CHR20	56859277	0
41	MLL	mir-223	Monocytes,Eosinophils,Neutrophils	CHR11	117814721	0
		mir-27	Monocytes,Eosinophils,Neutrophils	CHR11	117900789	0
42	FNBP4	mir-17	Monocytes,Eosinophils,Neutrophils	CHR11	47694757	1
		mir-25	Eosinophils,Neutrophils	CHR11	47695190	1
43	ANKRD13C	mir-17	Monocytes,Eosinophils,Neutrophils	CHR1	70500143	1
		mir-25	Eosinophils,Neutrophils	CHR1	70500373	1
44	JMY	mir-223	Monocytes,Eosinophils,Neutrophils	CHR5	78658260	0
		mir-25	Eosinophils,Neutrophils	CHR5	78658334	0
45	TULP4	mir-145	Neutrophils	CHR6	158654645	0
		mir-25	Eosinophils,Neutrophils	CHR6	158849670	0
46	PURA	mir-17	Monocytes,Eosinophils,Neutrophils	CHR5	139476340	0
		mir-223	Monocytes,Eosinophils,Neutrophils	CHR5	139475088	0
47	WRNIP1	mir-25	Eosinophils,Neutrophils	CHR6	2730754	0
		mir-425	Monocytes,Eosinophils,Neutrophils	CHR6	2730789	0
48	CFL2	mir-17	Monocytes,Eosinophils,Neutrophils	CHR14	34250685	1
		mir-25	Eosinophils,Neutrophils	CHR14	34250993	1
49	XPO1	mir-223	Monocytes,Eosinophils,Neutrophils	CHR2	61605946	1
		mir-27	Monocytes,Eosinophils,Neutrophils	CHR2	61559307	1
50	CPSF6	mir-145	Neutrophils	CHR12	67951536	0
		mir-25	Eosinophils,Neutrophils	CHR12	67950103	0
51	FAM108B1	mir-143	Neutrophils	CHR9	73671176	1
		mir-27	Monocytes,Eosinophils,Neutrophils	CHR9	73671302	1
52	VEGFA	mir-150	B cells,T cells,NK cells	CHR6	43860777	0
		mir-29	B cells,T cells	CHR6	43862020	0
53	CREBZF	mir-143	Neutrophils	CHR11	85050419	1
		mir-425	Monocytes,Eosinophils,Neutrophils	CHR11	85050475	1
54	RBM25	mir-143	Neutrophils	CHR14	72636433	0
		mir-17	Monocytes,Eosinophils,Neutrophils	CHR14	72636438	0
55	ANKRD28	mir-17	Monocytes,Eosinophils,Neutrophils	CHR3	15814687	1
		mir-27	Monocytes,Eosinophils,Neutrophils	CHR3	15813080	1
56	CAMK2D	mir-145	Neutrophils	CHR4	114594498	1
		mir-27	Monocytes,Eosinophils,Neutrophils	CHR4	114593376	1
57	SPTBN1	mir-17	Monocytes,Eosinophils,Neutrophils	CHR2	54749381	0
		mir-27	Monocytes,Eosinophils,Neutrophils	CHR2	54744358	0
58	PATZ1	mir-17	Monocytes,Eosinophils,Neutrophils	CHR22	30054752	1
		mir-27	Monocytes,Eosinophils,Neutrophils	CHR22	30052824	1
59	RFC4	mir-191	Monocytes,Eosinophils,Neutrophils	CHR3	187989868	1
		mir-25	Eosinophils,Neutrophils	CHR3	187990330	1
60	LBH	mir-143	Neutrophils	CHR2	30334519	0
		mir-27	Monocytes,Eosinophils,Neutrophils	CHR2	30336361	0
61	MKL2	mir-143	Neutrophils	CHR16	14267756	0
		mir-145	Neutrophils	CHR16	14266736	0
62	ARID1B	mir-25	Eosinophils,Neutrophils	CHR6	157571207	0
		mir-27	Monocytes,Eosinophils,Neutrophils	CHR6	157572089	0
63	UXS1	mir-17	Monocytes,Eosinophils,Neutrophils	CHR2	106076720	1
		mir-425	Monocytes,Eosinophils,Neutrophils	CHR2	106076817	1
64	ARID5B	mir-145	Neutrophils	CHR10	63479239	0
		mir-27	Monocytes,Eosinophils,Neutrophils	CHR10	63523803	0
65	SIK1	mir-17	Monocytes,Eosinophils,Neutrophils	CHR21	43659143	1
		mir-25	Eosinophils,Neutrophils	CHR21	43660200	1
66	EPHA4	mir-17	Monocytes,Eosinophils,Neutrophils	CHR2	221993234	1
		mir-27	Monocytes,Eosinophils,Neutrophils	CHR2	221991501	1
67	DHX15	mir-145	Neutrophils	CHR4	24138443	1
		mir-223	Monocytes,Eosinophils,Neutrophils	CHR4	24147984	1
68	ARGLU1	mir-17	Monocytes,Eosinophils,Neutrophils	CHR13	106007826	1
		mir-27	Monocytes,Eosinophils,Neutrophils	CHR13	106009387	1
69	ZBTB10	mir-223	Monocytes,Eosinophils,Neutrophils	CHR8	81596550	0
		mir-27	Monocytes,Eosinophils,Neutrophils	CHR8	81594435	0
70	CNOT2	mir-145	Neutrophils	CHR12	69016866	0
		mir-223	Monocytes,Eosinophils,Neutrophils	CHR12	69034261	0
71	SFRS11	mir-143	Neutrophils	CHR1	70489156	0
		mir-425	Monocytes,Eosinophils,Neutrophils	CHR1	70489117	0
72	ZNF420	mir-145	Neutrophils	CHR19	42311964	0
		mir-191	Monocytes,Eosinophils,Neutrophils	CHR19	42261162	0
73	FUBP1	mir-25	Eosinophils,Neutrophils	CHR1	78184871	1
		mir-27	Monocytes,Eosinophils,Neutrophils	CHR1	78182500	1
74	TRIM37	mir-143	Neutrophils	CHR17	54414016	1
		mir-17	Monocytes,Eosinophils,Neutrophils	CHR17	54430376	1
75	ERP44	mir-150	B cells,T cells,NK cells	CHR9	101784272	1
		mir-29	B cells,T cells	CHR9	101783580	1
76	FXR1	mir-17	Monocytes,Eosinophils,Neutrophils	CHR3	182177288	0
		mir-25	Eosinophils,Neutrophils	CHR3	182177589	0
77	BBX	mir-17	Monocytes,Eosinophils,Neutrophils	CHR3	109009783	0
		mir-27	Monocytes,Eosinophils,Neutrophils	CHR3	109012687	0
78	TNRC6B	mir-17	Monocytes	CHR22	38851739	0
		mir-27	Monocytes,Eosinophils,Neutrophils	CHR22	39058802	0
79	CNOT6L	mir-145	Neutrophils	CHR4	78858552	1
		mir-17	Monocytes,Eosinophils,Neutrophils	CHR4	78859174	1
